# Supplementary material
Source: PubMed Central journal article supplement (PMC6167614)
Supplement: Supp_Table2.pdf [file Supp_Table2.pdf]

SUPPLEMENTARY TABLE S2. AST ARITHMETIC MEAN (STANDARD DEVIATION) BASELINE VALUES  
FROM ANALYTE PROFILES AT THE BASAL AND ELEVATED GLUCOSE STATE BY GLUCOSE TOLERANCE POPULATION

| Baseline analyte     | Glucose state                 | Mean (SD)   |              |              |
|----------------------|-------------------------------|-------------|--------------|--------------|
|                      |                               | NGT         | PDM          | T2DM         |
| Glucose (mg/dL)      | Basal glucose <sup>a</sup>    | 93 (5.1)    | 110 (10.6)   | 157 (25.7)   |
| Insulin (μU/mL)      | Basal glucose <sup>b</sup>    | 10.4 (4.1)  | 22.8 (10.0)  | 13.9 (7.1)   |
|                      | Elevated glucose <sup>c</sup> | 74.8 (52.2) | 86.8 (30.4)  | 26.0 (16.2)  |
| C-peptide (nmol/L)   | Basal glucose <sup>d</sup>    | 0.77 (0.17) | 1.34 (0.32)  | 1.05 (0.28)  |
|                      | Elevated glucose <sup>c</sup> | 2.69 (0.81) | 2.85 (0.54)  | 1.39 (0.49)  |
| Total GLP-1 (pg/mL)  | Basal glucose <sup>e</sup>    | 12.9 (8.33) | 12.8 (10.16) | 26.8 (12.25) |
|                      | Elevated glucose <sup>e</sup> | 10.5 (6.66) | 11.9 (8.03)  | 20.5 (10.32) |
| Active GLP-1 (pg/mL) | Basal glucose <sup>c</sup>    | 1.75 (1.72) | 2.14 (1.66)  | 6.14 (4.07)  |
|                      | Elevated glucose <sup>c</sup> | 1.35 (0.73) | 1.35 (0.79)  | 3.80 (2.87)  |
| Glucagon (pg/mL)     | Basal glucose <sup>f</sup>    | 72 (19.9)   | 101 (28.8)   | 82 (17.0)    |
|                      | Elevated glucose <sup>g</sup> | 47 (11.0)   | 70 (24.9)    | 59 (9.7)     |
| Total PYY (pg/mL)    | Basal glucose <sup>c</sup>    | 39 (13.5)   | 43 (18.8)    | 75 (22.2)    |
|                      | Elevated glucose <sup>c</sup> | 35 (16.5)   | 40 (15.2)    | 68 (20.5)    |

For glucose, insulin, and C-peptide baseline is the average of the -10, -5, and 0 min values prior to arginine injection in the basal state or 50, 55, and 60 min after initiation of the glucose infusion; otherwise values are the 0 or 60 min value, as indicated.

<sup>a</sup> $p < 0.001$  NGT and PDM versus T2DM;  $p < 0.01$  NGT versus PDM.

<sup>b</sup> $P < 0.001$  NGT and T2DM versus PDM.

<sup>c</sup> $p < 0.001$  NGT and PDM versus T2DM.

<sup>d</sup> $p < 0.001$  NGT versus PDM;  $p < 0.01$  NGT and PDM versus T2DM.

<sup>e</sup> $p < 0.001$  NGT versus T2DM;  $p < 0.01$  PDM versus T2DM.

<sup>f</sup> $p < 0.001$  NGT versus PDM;  $p < 0.05$  PDM versus T2DM.

<sup>g</sup> $p < 0.001$  NGT versus PDM;  $p < 0.05$  NGT versus T2DM.
